# Supplementary material
Source: PubMed Central journal article supplement (PMC4137987)
Supplement: tx500150h_si_001.pdf [file tx500150h_si_001.pdf]

# Disposition of phenolic and sulfated metabolites after inhalation exposure to 4-chlorobiphenyl (PCB3) in female rats

*Kiran Dhakal<sup>§,†</sup>, Eric Uwimana<sup>§,†</sup>, Andrea Adamcakova-Dodd<sup>†</sup>, Peter S. Thorne<sup>§,†</sup>, Hans Joachim-Lehmler<sup>§,†</sup>, and Larry W. Robertson<sup>§,†,\*</sup>*

<sup>§</sup>Interdisciplinary Graduate Program in Human Toxicology, The University of Iowa, Iowa City, IA, United States.

<sup>†</sup>Department of Occupational and Environmental Health, The University of Iowa, Iowa City, IA, United States.

\*Corresponding author. Phone: 319-335-4346. Fax: 319-335-4290.  
E-mail: larry-robertson@uiowa.edu

## Supporting information

### Table of contents

|                                                                          |    |
|--------------------------------------------------------------------------|----|
| Table S1. Serum chemistry and free thyroxine (T4) levels.....            | S2 |
| Figure S1. Recovery of authentic standards from the spiked matrices..... | S3 |
| Figure S2. Putative PCB3 glucuronide in bile.....                        | S4 |
| Figure S3. Putative PCB3 catechol sulfate.....                           | S5 |

**Table S1.** Serum chemistry and free thyroxine (T4) levels in rats exposed to PCB3 and laboratory air for 2 h. Values are mean±SD, control (n=6), and each exposure time point (n=3)

|                                        | <i>Time after inhalation exposure to PCB3 (hour)*</i> |          |         |         |         |         |
|----------------------------------------|-------------------------------------------------------|----------|---------|---------|---------|---------|
|                                        | Control                                               | 0        | 1       | 2       | 4       | 24      |
| <b>Renal Function</b>                  |                                                       |          |         |         |         |         |
| <i>Creatinine (mg/dL)</i>              | 0.3±0.1                                               | 0.3±0.05 | 0.4±0.1 | 0.3±0.1 | 0.4±0.1 | 0.3±0.1 |
| <i>Blood Urea Nitrogen (mg/dL)</i>     | 11±5                                                  | 15±4     | 17±2    | 15±5    | 18±4    | 11±0.05 |
| <b>Serum Protein</b>                   |                                                       |          |         |         |         |         |
| <i>Total protein (g/dL)</i>            | 5±2                                                   | 5±1      | 6±0.2   | 5±1     | 6±0.5   | 4±0.3   |
| <i>Albumin (g/dL)</i>                  | 3±0.8                                                 | 3±0.6    | 3±0.2   | 3±0.7   | 3±0.3   | 3±0.2   |
| <b>Electrolytes balance</b>            |                                                       |          |         |         |         |         |
| <i>Calcium (mg/dL)</i>                 | 9±2                                                   | 10±2     | 11±2    | 8±2     | 11±1    | 10±0.6  |
| <i>Phosphorous (mg/dL)</i>             | 8±2                                                   | 11±3     | 12±2    | 10±4    | 8±1     | 8±0.5   |
| <i>Sodium (mmol/L)</i>                 | 107±24                                                | 111±22   | 129±7   | 106±30  | 127±12  | 115±5   |
| <i>Potassium (mmol/L)</i>              | 5±2                                                   | 6±1      | 8±2     | 7±3     | 5±1     | 4±0.3   |
| <i>Chloride (mmol/L)</i>               | 73±16                                                 | 77±14    | 90±4    | 76±22   | 86±10   | 77±3    |
| <b>Pancreas Function</b>               |                                                       |          |         |         |         |         |
| <i>Glucose (mg/dL)</i>                 | 235±47                                                | 271±71   | 304±115 | 165±26  | 246±44  | 264±12  |
| <b>Liver function</b>                  |                                                       |          |         |         |         |         |
| <i>Alkaline phosphatase (U/L)</i>      | 157±73                                                | 152±46   | 179±8   | 122±28  | 183±58  | 130±33  |
| <i>Alanine Aminotransferase (U/L)</i>  | 45±13                                                 | 40±5     | 94±44   | 95±65   | 66±23   | 41±4    |
| <i>Gamma-glutamyltransferase (U/L)</i> | 0±0                                                   | 0±0      | 0.3±0.6 | 1.3±1.5 | 0.3±0.6 | 0.0±0.0 |
| <b>Lipid metabolism</b>                |                                                       |          |         |         |         |         |
| <i>Cholesterol</i>                     | 80±22                                                 | 89±27    | 97±5    | 76±29   | 90±9    | 76±11   |
| <i>Triglycerides (mg/dL)</i>           | 67±41                                                 | 11±48    | 41±4    | 51±21   | 59±40   | 48±11   |
| <b>Respiratory/metabolic disorder</b>  |                                                       |          |         |         |         |         |
| <i>CO<sub>2</sub> mmol/L</i>           | 21±6                                                  | 19±5     | 23±2    | 17±4    | 24±2    | 25±1    |
| <b>Thyroid hormone</b>                 |                                                       |          |         |         |         |         |
| <i>Free thyroxine (T4) (pmol/L)</i>    | 39±13                                                 | 31±14    | 38±4    | 38±16   | 49±11   | 35±4    |

\* The estimated dose of inhalation in the rats killed at 0, 1, 2, and 4 hour after exposure was 23 µg/rat. The rats killed at 24 h have an estimated dose of 35µg/rat.

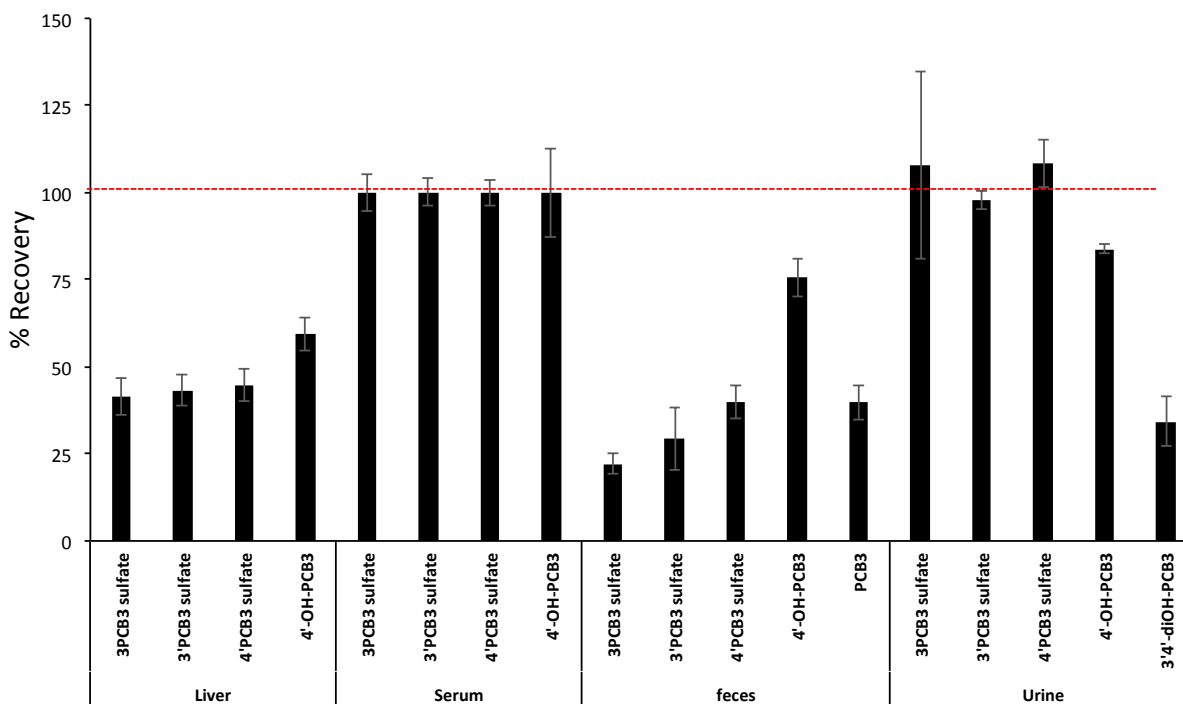

**Figure S1. Recovery of authentic standards in spiked samples.** Liver (1 g), serum (1 mL), feces (1 g), and urine (1 mL) samples derived from rats exposed to clean air were spiked with 0.5  $\mu\text{g}$  of each authentic standard, extracted in acetonitrile, cleaned in WAX solid phase extraction column, concentrated to nearly dryness, reconstituted in 35% acetonitrile in water (200  $\mu\text{L}$ ), internal standard (50  $\mu\text{L}$ , 3-F, 4'PCB3 @ 0.5  $\mu\text{g}/\text{mL}$  in 35% acetonitrile in water) was added, and analyzed for sulfates by LC/MS. To the same vial, after analysis of sulfates, internal standard (50  $\mu\text{L}$ , 3-F, 4'OH-PCB3 @ 0.5  $\mu\text{L}/\text{mL}$  in 100% methanol) was added and analyzed for phenols by LC/MS. For the analysis of PCB3, final acetonitrile extract was concentrated to exactly 500  $\mu\text{L}$  and 2  $\mu\text{L}$  was injected into GC/MS.

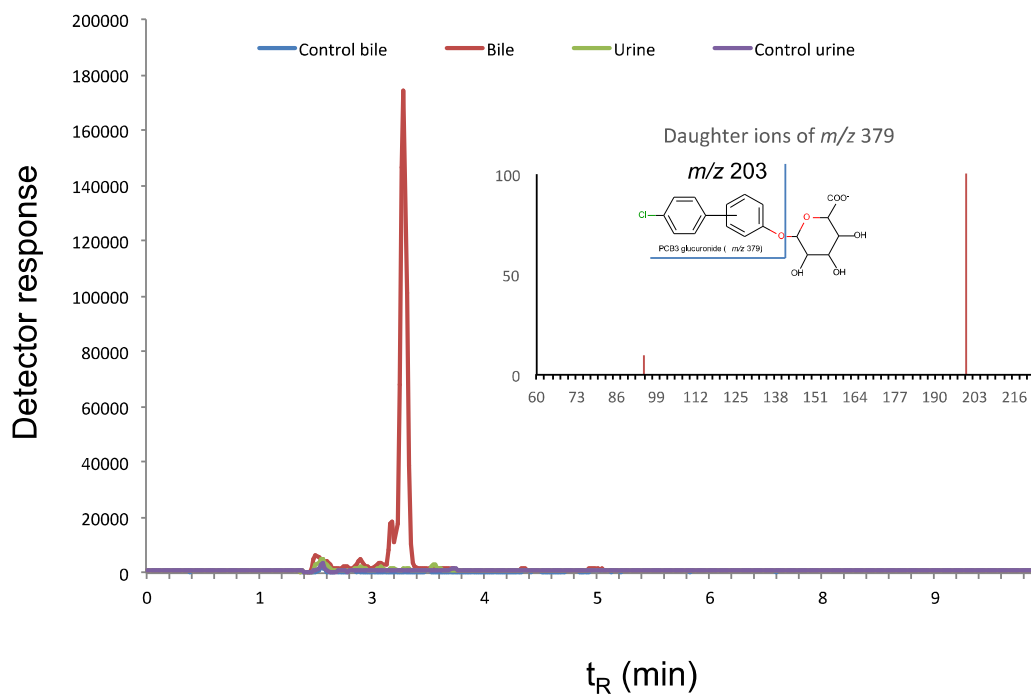

**Figure S2. Identification of a glucuronide conjugate of PCB3 in bile.** SIM chromatogram showing a putative glucuronide ( $m/z$  379) in bile. Urine or bile (1 mL) was extracted in acetonitrile, cleaned in WAX column, concentrated by solvent evaporation, reconstituted in 35% acetonitrile in water (200  $\mu$ L), and analyzed by LC/MS. A peak for putative glucuronide of  $m/z$  379 was observed at 3.2 min. Fragmentation of  $m/z$  379 resulted in a major daughter ion of  $m/z$  203, confirming that this is a glucuronide conjugate of monohydroxylated PCB3. The mass spectra is shown in the inset. This glucuronide metabolite was present only in bile.

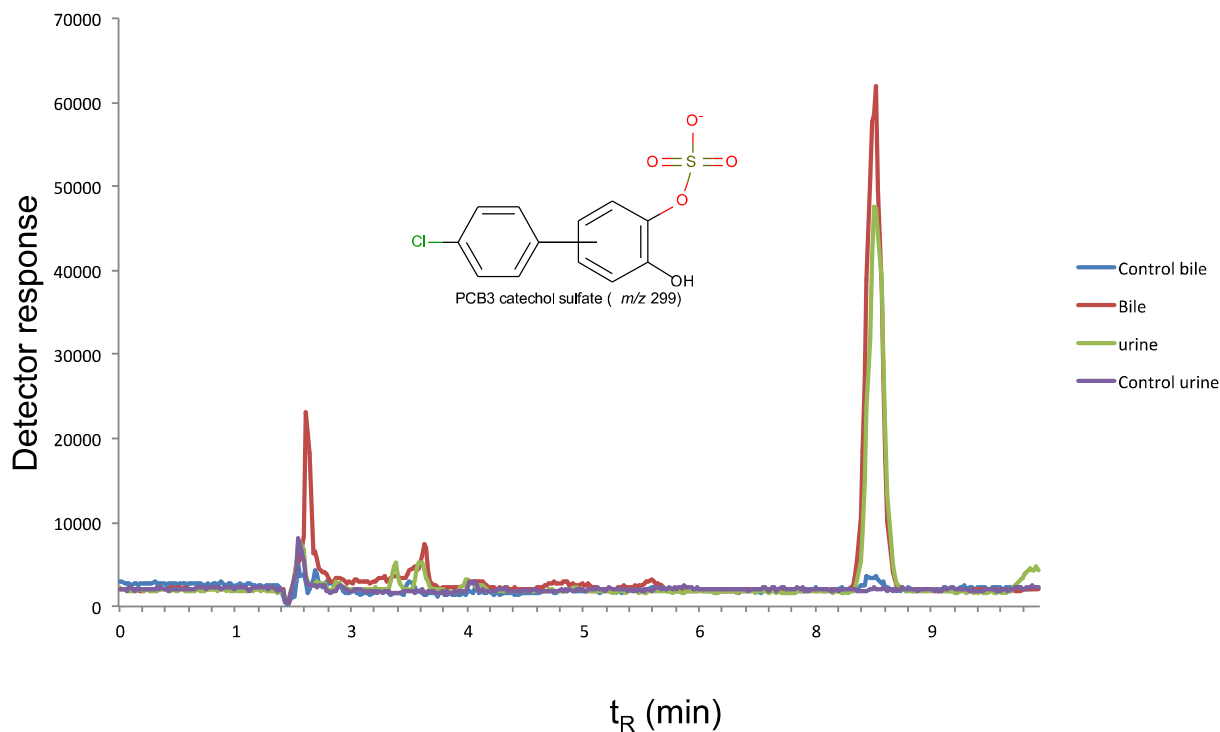

**Figure S3. Identification of putative PCB3 catechol sulfate.** SIM chromatogram showing a putative PCB3 catechol sulfate in urine and bile. Urine or bile (1 mL) was extracted in acetonitrile, cleaned in WAX column, concentrated by solvent evaporation, reconstituted in 35% acetonitrile in water (200  $\mu$ L), and analyzed by LC/MS. A peak for putative PCB3 catechol sulfate of *m/z* 299 was observed at 8.5 min. This metabolite was confirmed by its fragmentation to a major daughter ion of *m/z* 219, and also appearance of a peak corresponding to 3'4'-diOH-PCB3 (*m/z* 219) after incubation of the sample with sulfatase (refer text for detail).
